# Supplementary material for: Sustainable production of propionic acid: catalytic deoxygenation of lactic acid over MoOx/Fe
Source: Royal Society of Chemistry journal article supplement (doi:10.1039/d1nj02050a), 2021-01-01
Supplement: d1nj02050a1.pdf [file d1nj02050a1.pdf]

---

**Supporting Information**

**Sustainable production of propionic acid: catalytic deoxygenation of lactic acid over MoO<sub>x</sub>/Fe**

Xinli Li<sup>a</sup>, Jun Pang<sup>a</sup>, Yunsheng Dai<sup>b\*</sup>, Hongqin Wang<sup>b</sup>, Congming Tang<sup>a\*</sup>, Zhi Chen<sup>a</sup> and Chenglong Yang<sup>c</sup>

<sup>a</sup>School of Chemistry and Chemical Engineering, Chongqing University of Technology, Chongqing 400054, PR China;

<sup>b</sup>Sino-Platinum Metals Co., Ltd., Kunming 650106, PR China; <sup>c</sup>Chongqing Kunding Environmental Protection Technology Co., Ltd., Chongqing 400000, PR China)

**Figures**

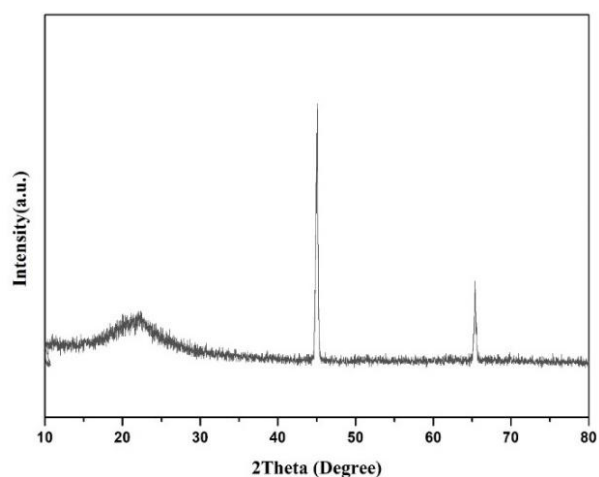

**Fig. S1** XRD of Fe powder

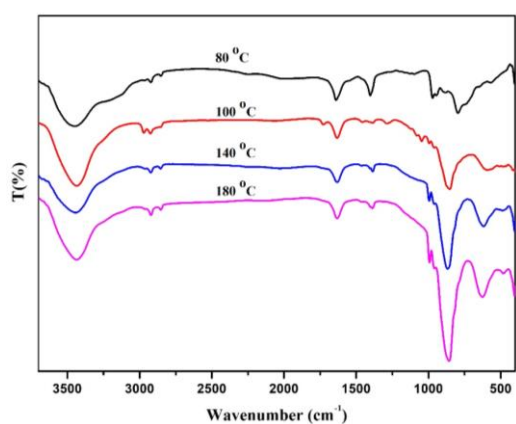

**Fig. S2** FT-IR spectra of catalysts prepared at different hydrothermal temperatures

Fe/Mo molar ratio = 0.908, calcination temp., 450°C, calcined atmosphere, air.

---

\* Corresponding author. Tel.: +86 23 62563250

E-mail address: daiysh@ipm.com.cn (Y. S. Dai) and tcm tang2001@cqut.edu.cn (C. M. Tang).

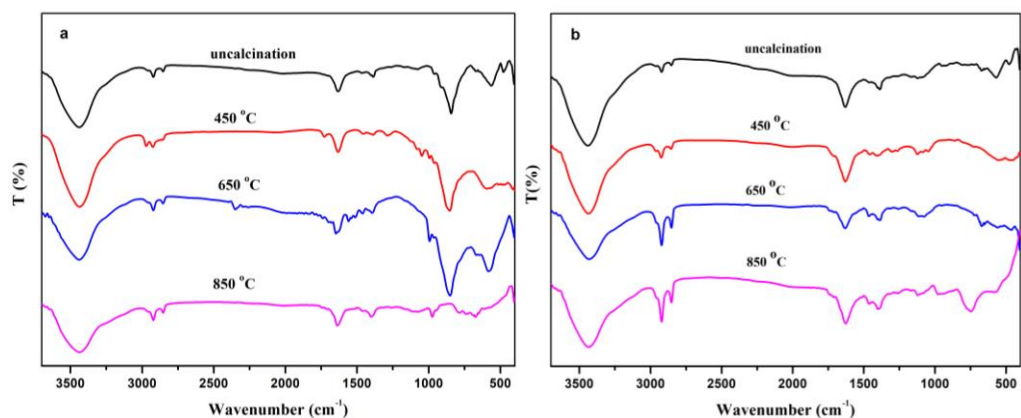

**Fig. S3** FT-IR spectra of catalysts prepared at different calcined temperatures (a, before reaction and b, after reaction)

Fe/Mo molar ratio = 0.908, hydrothermal synthesis temp., 100°C, calcined atmosphere, air.

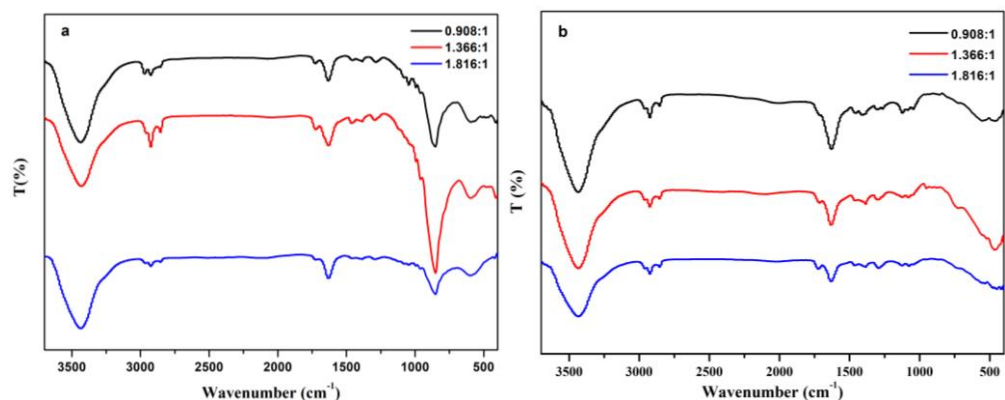

**Fig. S4** FT-IR spectra of catalysts with different Fe/Mo ratios calcined at air atmosphere (a, before reaction and b, after reaction)

Hydrothermal synthesis temp., 100°C, calcination temp., 450°C, calcined atmosphere, air.

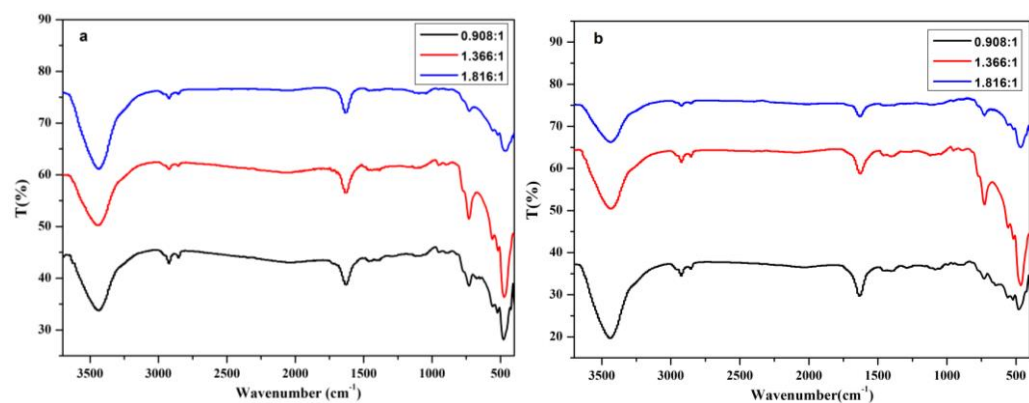

**Fig. S5** FT-IR spectra of catalysts with different Fe/Mo ratios calcined at hydrogen atmosphere (a, before reaction and b, after reaction)

Hydrothermal synthesis temp., 100°C, calcination temp., 450°C, calcined atmosphere, hydrogen.

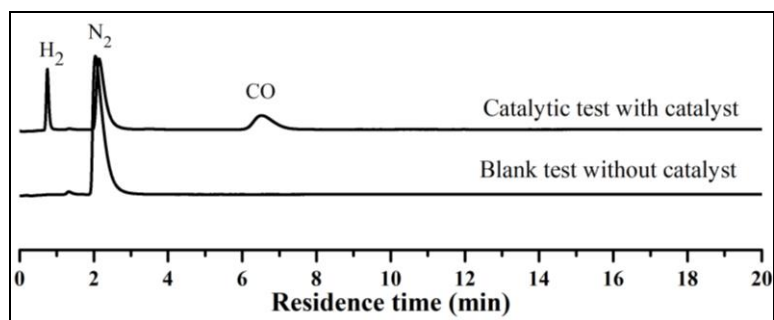

**Fig. S6** GC profile of tail gas

Catalytic test: Catalyst: 0.38 mL, Fe/Mo molar ratio=0.908; carrier gas N<sub>2</sub>, 1.2 mL/min; LA feedstock 20wt%, LA feed flow rate 1.6 mL/h, reaction temp. 390°C. Blank test: the reaction proceeds in the absence of catalyst at the same conditions as the catalytic test.

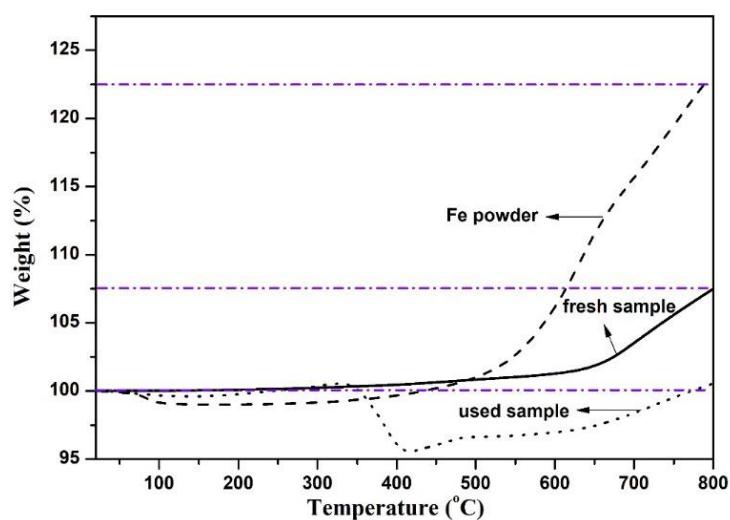

**Fig. S7** TG of fresh sample, used sample and Fe powder (Testing atmosphere: air)
